# Supplementary material for: Dual lithium storage of Pt electrode: alloying and reversible surface layer
Source: Royal Society of Chemistry journal article supplement (doi:10.1039/d1ta04379j), 2021-01-01
Supplement: d1ta04379j1.pdf [file d1ta04379j1.pdf]

## **Supporting information**

### **Dual Lithium Storage of Pt electrode: Alloying and Reversible Surface Layer**

Yunok Kim<sup>1</sup>, Woosung Choi<sup>1</sup>, Ok-Hee Kim<sup>2</sup>, Hyunyoung Park<sup>1</sup>, Soyeong Yun<sup>1</sup>, Ranjith Thangavel<sup>1</sup>, Yong-Hun Cho<sup>3\*</sup>, and Won-Sub Yoon<sup>1\*</sup>

<sup>1</sup> Department of Energy Science, Sungkyunkwan University, Suwon 16419, South Korea

<sup>2</sup> Department of Science, Republic of Korea Naval Academy, Jinhae-gu, Changwon 51704, South Korea

<sup>3</sup> Department of Chemical Engineering, Kangwon National University, Samcheok 245-711, South Korea

\* Corresponding Author E-mail: [yhun00@kangwon.ac.kr](mailto:yhun00@kangwon.ac.kr); [wsyoon@skku.edu](mailto:wsyoon@skku.edu)

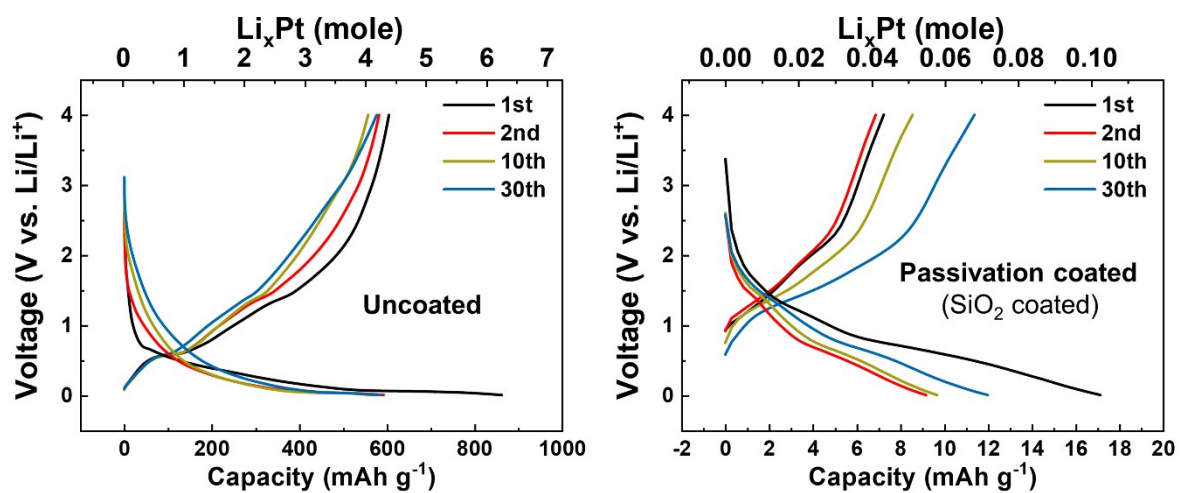

**Figure S1.** Voltage profile of the uncoated Pt electrode (left), and passivation coated Pt electrode (right) with the potential window from 0.001 to 4.0 V vs. Li/Li<sup>+</sup> upon the 30 cycles.

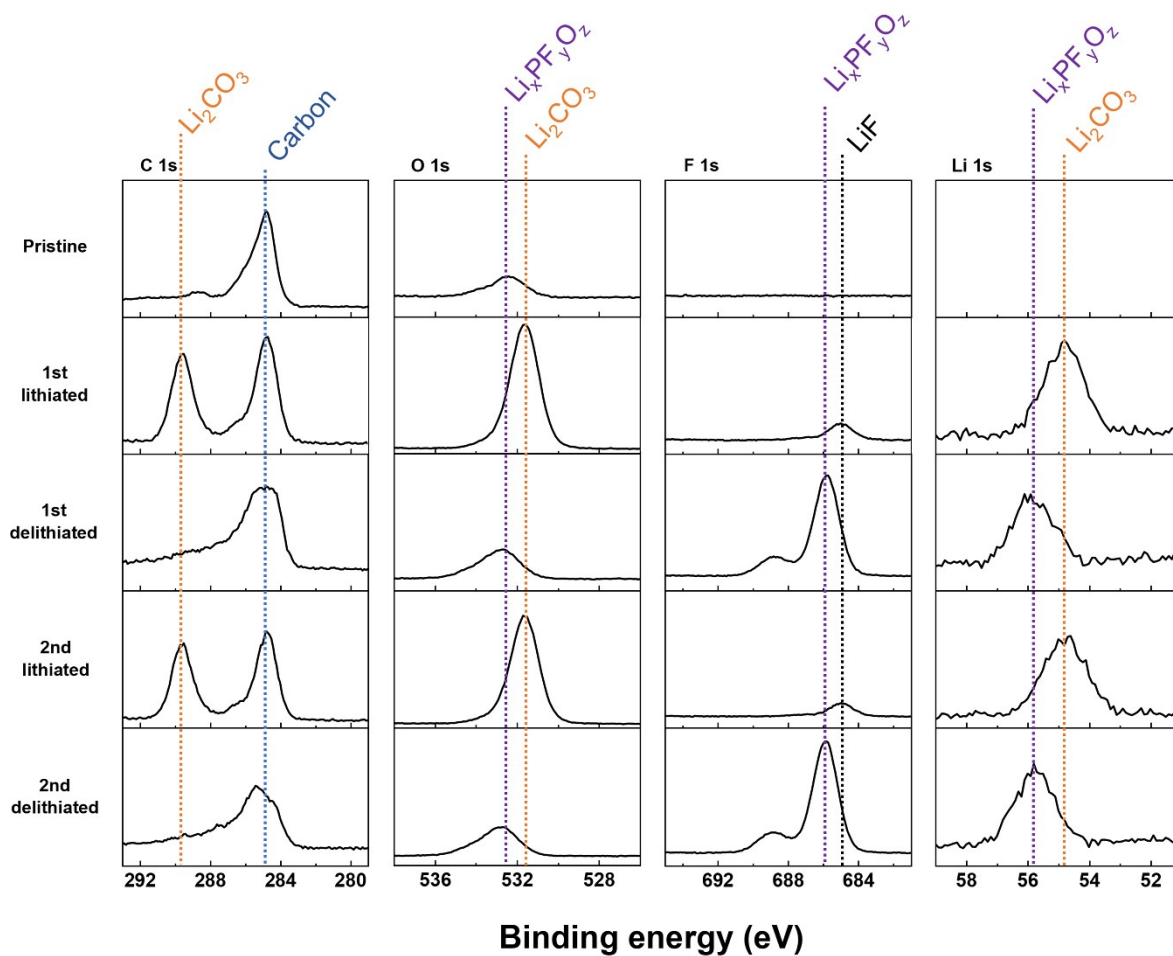

**Figure S2.** The *ex situ* X-ray photoelectron spectroscopy obtained from the Pt electrode during the 2<sup>nd</sup> cycles.

**Table S1.** Theoretical potential of the Pt electrode during the lithiation (Pt → Li<sub>2</sub>Pt), and delithiation (Li<sub>2</sub>Pt → LiPt → Li<sub>0.5</sub>Pt → Pt).

|                                  | <b>First lithiation</b>      |                                         |
|----------------------------------|------------------------------|-----------------------------------------|
|                                  | <b>Theoretical potential</b> | <b>Experimental value</b>               |
| <b>Pt → Li<sub>2</sub>Pt</b>     | 0.8185 V                     | 0.1055 V ( <b>0.7862 V after 2cyc</b> ) |
|                                  | <b>First delithiation</b>    |                                         |
|                                  | <b>Theoretical potential</b> | <b>Experimental value</b>               |
| <b>Li<sub>2</sub>Pt → LiPt</b>   | 0.4167 V                     | 0.5559 V                                |
| <b>LiPt → Li<sub>0.5</sub>Pt</b> | 1.1445 V                     | 1.0594 V                                |
| <b>Li<sub>0.5</sub>Pt → Pt</b>   | 1.2961 V                     | 1.4111 V                                |

The final energy values of each compound of Pt, Li<sub>0.5</sub>Pt, LiPt, Li<sub>2</sub>Pt, and bcc Li obtained through the generalized gradient approximation (GGA) method were utilized.<sup>1</sup> And referring to the following formula proposed by Urban et al.,<sup>2</sup> the theoretical potential of stepwise reaction constituting the lithiation/delithiation process of the Pt electrode are calculated and compared with the experimental values.

$$V = - \frac{E(Li_{x_2}Pt) - E(Li_{x_1}Pt) - (x_2 - x_1)E(Li^{bcc})}{(x_2 - x_1)F}$$

$V$ : Theoretical redox potential of specific reaction.

$E(Li_{x_2}Pt)$ ,  $E(Li_{x_1}Pt)$ ,  $E(Li^{bcc})$ : Internal energies of the lithiated, delithiated Pt phase, and metallic Li.

$x_2$ : Amount of Li at the lithiated state.

$x_1$ : Amount of Li at the delithiated state.

$F$ : Faraday constant.

## Reference

- 1 A. Jain, G. Hautier, S. P. Ong, C. J. Moore, C. C. Fischer, K. A. Persson and G. Ceder, *Phys. Rev. B*, 2011, **84**, 045115.
- 2 A. Urban, D.-H. Seo and G. Ceder, *npj Comput. Mater.*, 2016, **2**, 16002.
